# Supplementary material for: Molecular Diversity of Linear Peptides Revealed by Transcriptomic Analysis of the Venom Gland of the Spider Lycosa poonaensis
Source: MDPI journal article supplement (doi:10.3390/toxins14120854), 2022-12-03
Supplement: s1 [file s1]

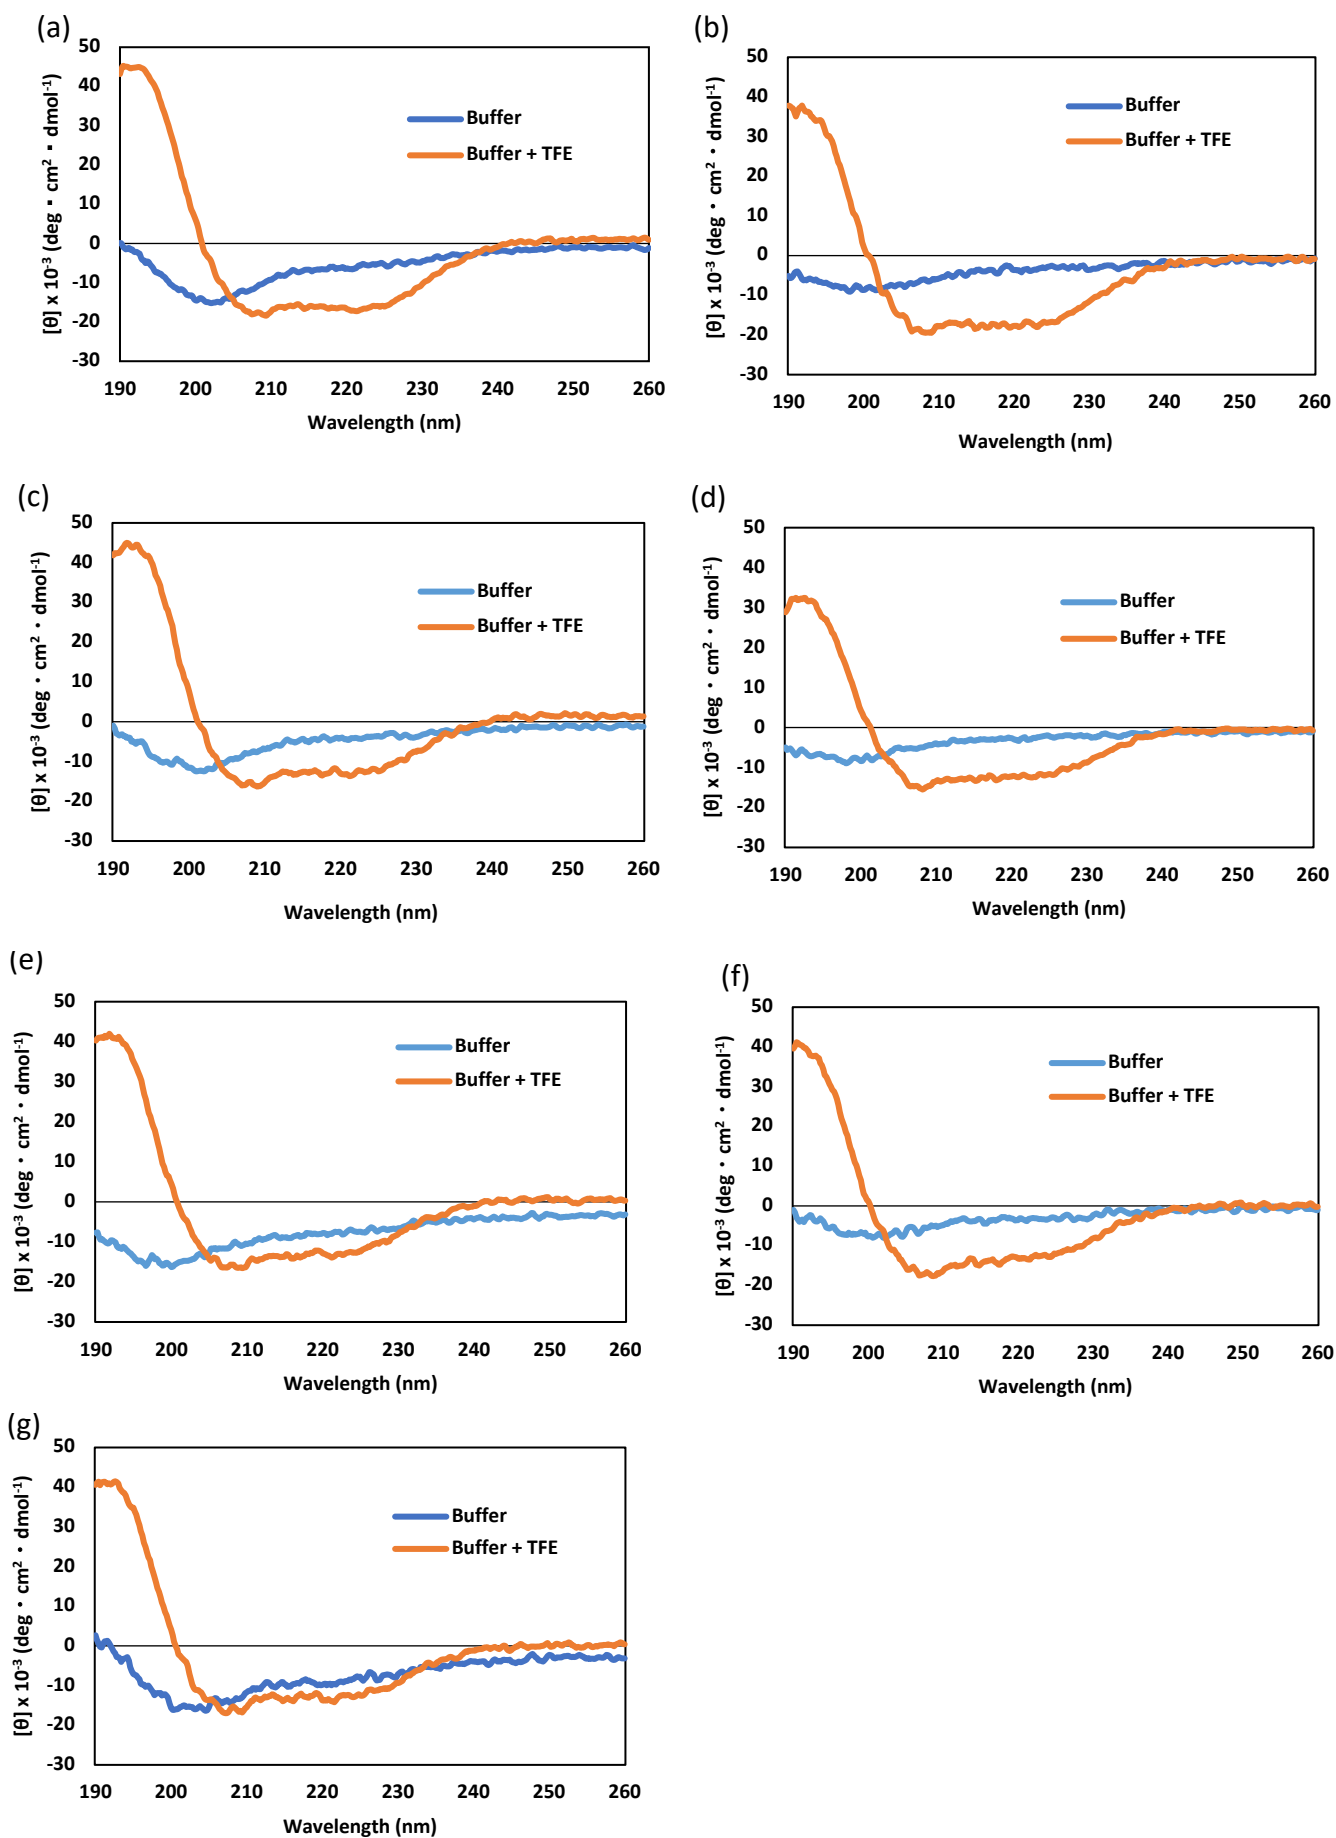

Figure S2 CD spectra of linear peptides synthesized in this study. (a) M-lycotoxin-Lp1a, (b) M-lycotoxin-Lp1b, (c) M-lycotoxin-Lp3a, (d) M-lycotoxin-Lp4, (e) M-lycotoxin-Lp5a, (f) M-lycotoxin-Lp5b, and (g) M-lycotoxin-Lp6. Spectra were obtained in 0.2 M phosphate buffer at pH 7.0 (dotted line) and in 50% TFE in 0.2 M phosphate buffer at pH 7.0 (solid line).
