# Supplementary material for: Molecular Diversity of Linear Peptides Revealed by Transcriptomic Analysis of the Venom Gland of the Spider Lycosa poonaensis
Source: MDPI journal article supplement (doi:10.3390/toxins14120854), 2022-12-03
Supplement: s1 [file s1]

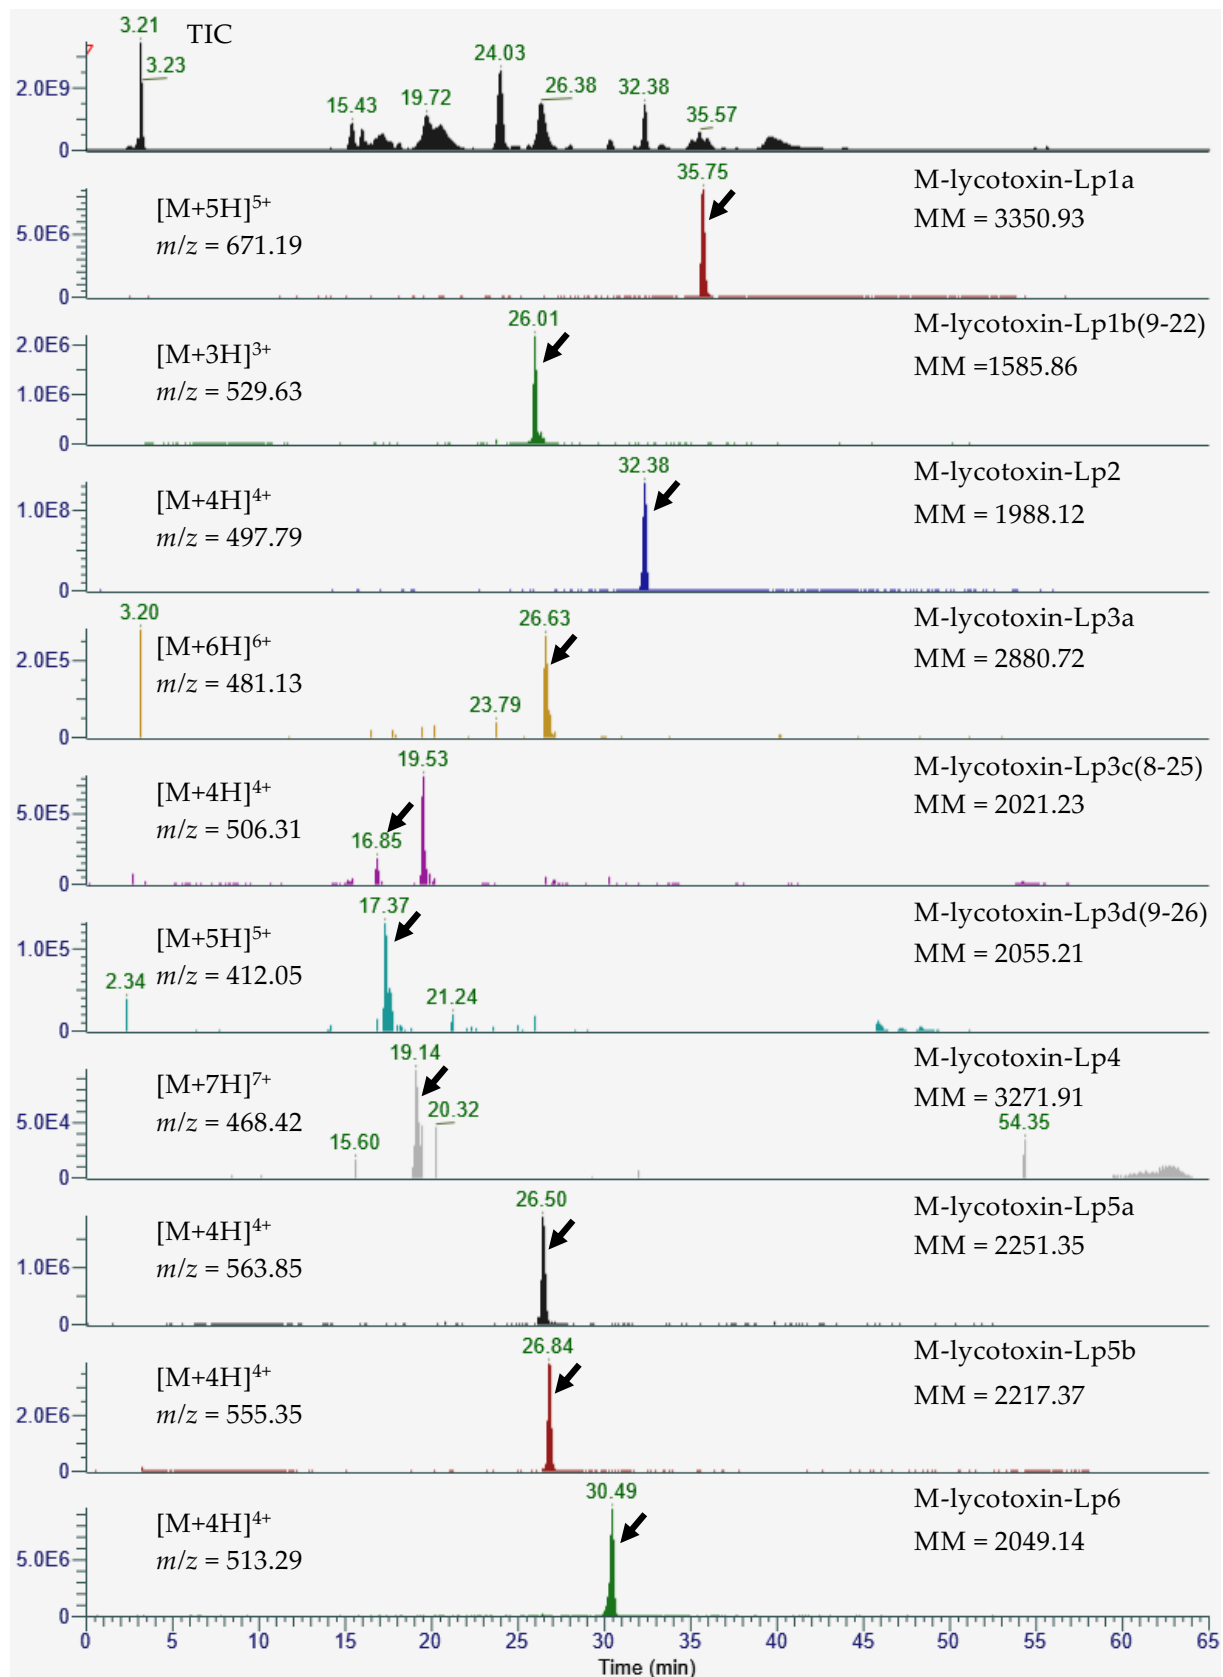

Figure S1 High-resolution LC/MS analysis of the *L. poonaensis* venom. Arrows indicate peaks corresponding to linear peptides.
