# Supplementary material for: Molecular Diversity of Linear Peptides Revealed by Transcriptomic Analysis of the Venom Gland of the Spider Lycosa poonaensis
Source: MDPI journal article supplement (doi:10.3390/toxins14120854), 2022-12-03
Supplement: s1 [file s1]

Table S1. List of the sequences of precursors of peptides and proteins identified by transcriptomic analysis of the *L. poonaensis* spider venom gland

(1) Neurotoxins

| Name     | Sequence                                                                                                                 | Similar peptide (Accession No., species)                           |
|----------|--------------------------------------------------------------------------------------------------------------------------|--------------------------------------------------------------------|
| m.59186  | MSSGPSLSLSDTAHFRKSCLEIGEVCDGNANDCQCCRSNGFCHCSWIFNHCTCQVGDSSSKSYGVCLWKQKNCNPKPGMCTKPCTNRRRCKNRSRG                         | $\omega$ -ctenitoxin-Pn3a (P81790, <i>Phoneutria nigriventer</i> ) |
| m.1192   | MKTSTVFLGLCAIVVLMITADLSGADEMNSQDAPEERGYCAEKGIRCDIHCTGLKCKCNDSGYNCVCRKK                                                   | Purotoxin-1 (P86269, <i>Alopecosa marikovskyi</i> )                |
| m.38262  | MGRWIFAIFLGITLLTQVLLPSAYMATSDADTPAVDDYADVARLLYFARKRSCIKRGSSCDHRPNDCDNDSSCRCNLWGTNCRQCQRMGLFQKWGK                         | U8-agatoxin-Ao1a (Q5Y4U4, <i>Agelena orientalis</i> )              |
| m.218293 | MKYFLKPLVVTVLLLCYAVMTNAYVMRDSSLDYQEPNYEALRQYLLSTRNLNNIPNRRSCIRRGSSCDHRPSDCCFNSSCRCNLWGTNCRQCQAGLFQKWGK                   | U8-agatoxin-Ao1a (Q5Y4U4, <i>Agelena orientalis</i> )              |
| m.9      | MSPKVQALLFLVGLITFLVHAEELSEIEESERACAEHKSNCNWKPCCDKMSCHCSAAFTNCKCQKGVIRKIIDWIGGK                                           | U16-lycotoxin-Ls1a (B6DD52, <i>Lycosa singoriensis</i> )           |
| m.11889  | MSPKMQVLLLTIWLFMFLAVHSHEELSESAESERSCANEYQSCDWYNRPCCDNISCVCSWIGTNCECKKGIIRTIRDWINGK                                       | U16-lycotoxin-Ls1a (B6DD52, <i>Lycosa singoriensis</i> )           |
| m.16586  | MIRYVLISALLVVAVYSFTFEDENEDVFLLEEAKELDPEEERRIALPPGAVCNGHKSDCQCFGAKYKCSCPWLWRFRRSAKCHCKKGAWTAIKKRSCRNRYQWGS                | U2-lycotoxin-Ls1a (B6DD29, <i>Lycosa singoriensis</i> )            |
| m.30919  | MKILFVLISILYSVHCFTSEEIVGSEHLANELEAVEDINSEQNVALESTREEERSCADMGQDCADDCCLNIARCNCWFGKYFCSCFTFGNYQTCQAKRGKCTRNRPPQSCPKSNINHKKG | U13-lycotoxin-Ls1c (B6DD20, <i>Lycosa singoriensis</i> )           |
| m.8162   | MKIIVIFGVLLVTLFSYSSAEMFDDFEQADEADELLSLIEEQTRAKECTPRFNDCTNDRHSCCRGELFKDVCTCFYPENGNGNEFCTCQPKHFKYIEKGTDKIKIGSKIKSWFG       | U3-lycotoxin-Ls1a (B6DCQ5, <i>Lycosa singoriensis</i> )            |
| m.6715   | MSTFTQCKRKVIFNKLFSKQIPLIFPFYRAKACTPRFRDCSHDRHSCCRSSLFKDVCTCFYPENGDKKEVCSCQPKHLKYMekatDKIKYLIG                            | LSTX-D6 (B6DCU5, <i>Lycosa singoriensis</i> )                      |
| m.6722   | MKVfVVVALLVTLISYSSSEGIEDLEADDFLSLMANEQPRAKACTPRFRDCSHDRHSCCRSSLFKDVCTCFYPENGDKKEVCSCQPKHLKYMekatDKIKYLIG                 | LSTX-D6 (B6DCU5, <i>Lycosa singoriensis</i> )                      |
| m.6716   | MNFLKGNINTFRNDCIPKHHECTSNKHGCCRGKIFKYKCQCTTVVDQSGEQAERCFCGTATHHKAVELMAGFGKKLFG                                           | U1-lycotoxin-Ls1ee (B6DCN6, <i>Lycosa singoriensis</i> )           |
| m.103490 | MANEQPRSDCIPKHHECTSNKHGCCRGKFFKYKCQCITVVDQSGEQAERCFCGTATHHKAVELMAGIGKKLFG                                                | U1-lycotoxin-Ls1e (B6DCJ5, <i>Lycosa singoriensis</i> )            |
| m.6709   | MKVfVVVALLVTLISYSSSEGIEDLEADDFLSLMANEQPRNDCIPKHHECTSNKHGCCRGKIFKYKCQCTTVVDQSGEQAERCFCGTATHHKAVELMAGFGKKLFG               | U1-lycotoxin-Ls1e (B6DCJ5, <i>Lycosa singoriensis</i> )            |
| m.6148   | MKYQILFGLVFLTLISYCSSEFEDAGLFMDEEMVEADDPNAIARKDDNENCIKHHECTSNRHGCCRGKLFKYKCQCVKIVNAQKEETERCACITPGLHKAVEFVLQLFKKAIA        | U5-lycotoxin-Ls1a (B6DCV0, <i>Lycosa singoriensis</i> )            |
| m.69253  | MKVLVLTFLVFLTLFSYSSTEAIHEFDSNAEEDMLSVFACEQVRAKACSPRLHDCSDDRHSCCRGEKYKVICNCYDLEGEDKSEVSTREQPKSEKNIVKLD EKSKTVV            | U4-lycotoxin-Ls1a (B6DCT6, <i>Lycosa singoriensis</i> )            |
| m.157117 | MKVLVIFSFLVFLTLFSYSSTEAIHEFDSNAEEDMLSVLASEQERAKACTPRLHDCSDERHSWCRGEMFKDVCYCFYPEGEDKTEVCSCQPKSHKYNEKVVDKTNTLVG            | U4-lycotoxin-Ls1a (B6DCT6, <i>Lycosa singoriensis</i> )            |
| m.190400 | MKLLFFTGLFLLVVVNLIKAEAEANERAAICIRLERQCTKTPGNCCSGLKCECYQRFEGKGVAKGKRCWCIEKDVTYKNKK                                        | U6-lycotoxin-Ls1d (B6DCV4, <i>Lycosa singoriensis</i> )            |
| m.2157   | MKILFFTLLSVASFIEVEAKSGKSCLTYAEVCTKNASGCCSDLRDCYIRYEEGVEKGEKCWCNYKDVYKKA                                                  | U7-lycotoxin-Ls1c (B6DCW9, <i>Lycosa singoriensis</i> )            |
| m.2159   | MKIVLFAVIALLTVSLIEIAQSKGVCLPYAAVCKTNASRCCSGLTCDCYLRFEFGVQKGEKCWCIIHKGVTYTKE                                              | U7-lycotoxin-Ls1c (B6DCW9, <i>Lycosa singoriensis</i> )            |
| m.10500  | MKLIIFTGLVIFAIAIAEAEANERACIAEYGECLKAPGNCCSNLACDCYGRFKNGKEIGRNCFCLEKGVIYKREK                                              | U8-lycotoxin-Ls1s (B6DCX9, <i>Lycosa singoriensis</i> )            |
| m.10497  | MKLIIFTVLVLSIVSLIKAEAEERACVAYQYGECLKEPGNCCSNLVCDCYGRFKNGKEIGRNCFCLEKGIIYKREK                                             | U8-lycotoxin-Ls1s (B6DCX9, <i>Lycosa singoriensis</i> )            |
| m.10498  | MKLIIFTGLVIFAIAIAEAEANERACIAEYGECLKAPGNCCSNLACDCYGRFKNGKEIGRNCFCLEKGIIYKREK                                              | U8-lycotoxin-Ls1s (B6DCX9, <i>Lycosa singoriensis</i> )            |
| m.3722   | MKLGIFLLFSLVVLAVASESIEENINDNLPEQQRACADLNEKCTEGDDCSCCGERGRCDCNWPGKPGCYCMRGGPFDLIAKKFKC                                    | U12-lycotoxin-Ls1a (B6DD13, <i>Lycosa singoriensis</i> )           |

## (2) Cytolytic linear peptides

| Name   | Sequence                                                                                                                                                                                                                                                                                                                 | Similar peptide (Accession No., Species)                |
|--------|--------------------------------------------------------------------------------------------------------------------------------------------------------------------------------------------------------------------------------------------------------------------------------------------------------------------------|---------------------------------------------------------|
| m.2649 | MTVNDDEEARIWLTALKFIGKNLGKHFQKQSLKGRSEDMSEMTMKKQESG                                                                                                                                                                                                                                                                       | LyeTx I (C0HJU9, <i>Lycosa erythrognatha</i> )          |
| m.2799 | MSANDDEEARIWLTALKFLGKNLGKHFQKQSLKGRSEDISENLSADSFQSLEEVKTCMQMTMKKQESG                                                                                                                                                                                                                                                     | LyeTx I (C0HJU9, <i>Lycosa erythrognatha</i> )          |
| m.2698 | MSANDDEEARIWLTALKFIGKNLGKHFQKQSLKGRSEDMTVNDDEEARIWLTALKFIGKNLGKHFQKQSLKGRSEDMSECLQMTMNKQESG                                                                                                                                                                                                                              | LyeTx I (C0HJU9, <i>Lycosa erythrognatha</i> )          |
| m.2695 | MSANDDEEARIWLTALKFIGKNLGKHFQKQSLKGRSEDMTVNDDEEARIWLTALKFLGKNLGLKFIGKNLGKHFQKQSLKGRSEDMSECLQMTMNKQESG                                                                                                                                                                                                                     | LyeTx I (C0HJU9, <i>Lycosa erythrognatha</i> )          |
| m.2781 | MTKKKQESWLTALRIWLTALKFLGKNLGKHLAKQQLAKLGRSEDISENDDEEARIWLTALKFLGKNLGKHFQKQSLKGRSEDISENLSADDEEA<br>RIWLTALKFIGKNLLVNSIKIFR                                                                                                                                                                                                | LyeTx I (C0HJU9, <i>Lycosa erythrognatha</i> )          |
| m.2690 | MSANDDEEARIWLTALKFLGKNLGKHRISQNSSLSLEEVKTSKTCQSQNNSFQSLEEVKIMSANDDEEARIWLTALKFIGKNLGKHFQKQSLKGRSE<br>DMTVNDDEEARIWLTALKFLGKNLGLKFIGKNLGKH                                                                                                                                                                                | LyeTx I (C0HJU9, <i>Lycosa erythrognatha</i> )          |
| m.2667 | MKEIAAQTLGREESLSENEEEARGRLQAFQAKMKEIAAQTALGREENLFANEERVIWLPALKFLASHIAMEQLSKLGRNEQTPEEARIWLTALKFIGKNLG<br>KHFAKQQLSKLGRNEQTPEEARIWLTALKQSLKGR                                                                                                                                                                             | LyeTx I (C0HJU9, <i>Lycosa erythrognatha</i> )          |
| m.2650 | MKEIAAQTLGREESLSENEEEARGRLQAFQAKMKEIAAQTALGREENLFANEERVIWLPALKFLASHIAMEQLSKLGRNEQTPEEARIWLTALNKFIGKNL<br>GKHFAKQQLSKLGRNEQTPEEARIWLTALKQSLKGR                                                                                                                                                                            | LyeTx I (C0HJU9, <i>Lycosa erythrognatha</i> )          |
| m.2660 | MKEIAAQTLGREESLSENEEEARGRLQAFQAKMKEIAAQTALGREENLFANEERVIWLPALKFLASHIAMEQLSKLGRNEQTPEEARIWLTALNKFLG                                                                                                                                                                                                                       | M-lycotoxin-Ls3b (P0C2U7, <i>Lycosa erythrognatha</i> ) |
| m.2706 | MKEEIAAQTALGREENLSENEEEARGRLQAFQAKMKEIAAQTALGREENLFANEERVIWLPALKFLASHIAMEQLSKLGRNEQTPEEARIWLTALNNASEAL<br>GREEIWGFCK                                                                                                                                                                                                     | M-lycotoxin-Ls3b (P0C2U7, <i>Lycosa erythrognatha</i> ) |
| m.2678 | MKEIAAQTALGREENSVSANEDDEEARSKWKAFLAKMKEIAAQTALGREENLSENEEEARGRLQAFQAKMKEIAAQTALGREENLSENEEEARGRLQAFQAKM<br>KEIAAQTALGREENLSENEEEARGRLQAFQAKMKEIAAQTALGREENSVSANEDDEEARSKWKAFLAKMKEIAAQTALGREENLSENEEEARGRLQAFQAKM<br>KEIAAQTALGREENLSENEEEARGRLQAFQAKMKEIAAQTALGREENLSENEEEARGRLQAFQAKMKEIAAQTALGREENLSENEEEARGRLQAFQAKM | M-lycotoxin-Ls3b (P0C2U7, <i>Lycosa erythrognatha</i> ) |
| m.2715 | MSANDDEEARIWLTALKFIGKNLARIWLTALKFLGKNLGLKFIGKNLGKHFQKQSLKGRSEEARIWLTALKFIGKNLGKHLAKQQLSKLGRNEETPGSFSA<br>DDELERAGLGKIGAFIKKAYAIYKAKAAGRNEQTPATVSANDDEEARKIKWFKAMKSIKYVAKKQQLKHLGGEN                                                                                                                                      | M-lycotoxin-Hc2a (P61508, <i>Hogna carolinensis</i> )   |
| m.2734 | MSANDDEEARIWLTALKFIGKNLGKHFQKQSLKGRSEDMTVNDDEEARIWLTALKFIGKNLGKHFQKQSLKGRSEDMTVNDDEEARIWLTALKFIGK<br>NLGKHLAKQQLSKLGRNEETPGSFSAADDELERAGLGKIGAFIKKAYAIYKAKAAGRNEQTPATVSANDDEEARKIKWFKAMKSIKYVAKKQQLKHLGGE<br>N                                                                                                           | M-lycotoxin-Hc2a (P61508, <i>Hogna carolinensis</i> )   |
| m.2795 | MSANDDEEARIWLTALKFIGKNLGKHFQKQSLKGRSEDMTVNDDEEARIWLTALKFLGKNLGLKFIGKNLGKHFQKQSLKGRSEDMTVNDDEEARI<br>WLTALKFIGKNLGKHLAKQQLSKLGRNEETPGSFSAADDELERAGLGKIGAFIKKAYAIYKAKAAGRNEQTPATVSANDDEEARKIKWFKAMKSIKYVAKK<br>QLKHLGGEN                                                                                                   | M-lycotoxin-Hc2a (P61508, <i>Hogna carolinensis</i> )   |
| m.2773 | MKEIASLQMRMKREIAAQTALGREENLSENEEEARGRLQAFQAKMKEIAAQTALGREENSVSANEDDEEARSKWKAFLAKMKEIAAQTALGREENLSENEEE<br>ERMVWLLPLKFLASHVAMEQLSKLGSKIATKLGRNEQIPVISANEDEEERMVWLLPLKFLASHVAMEQLSKLGSKIATKLGRNEETPVSFADDDGEERAG<br>LGKIGALIKKAYAIYKAKAAGRNEQTPATVSANDDEEARKIKWFKAMKSIKYVAKKQQLKHLGGEN                                     | M-lycotoxin-Hc2a (P61508, <i>Hogna carolinensis</i> )   |

### (3) Protease inhibitor

| Name     | Sequence                                                                                                                                                                                                                                                                             | Similar peptide (Accession No., species)                          |
|----------|--------------------------------------------------------------------------------------------------------------------------------------------------------------------------------------------------------------------------------------------------------------------------------------|-------------------------------------------------------------------|
| m.201956 | MNFQFVLLCMTSVVVVQYAVAFKLIRSKRSTNVP SRCLQDPDSGMCLAYFLNYYNPSGECETFVYGGCQGNNDNFWTKDDCEAICKPKTNETEEINSL<br>LLESLESLIEGKDVCEYP PETGECRALFIRYYDGEKCSFVYGGCDGNPNNFETEVECMERCGPKSEDESEENEV                                                                                                   | U19-barytoxin-Tl1a (W4VSH9, <i>Trittame loki</i> )                |
| m.221752 | MKNISIFS VVLTLSFSLAVSFTYPRSRSSDDESSSRCLPPVTGLCRAYFLMYYHNATTNTCNRFVFGGCIGNGNKFWTGEECVEACGGTIDDTMPIQS<br>FHYDYDFEDYDDPCDKPLVVGHCADIPRFYFDGKECTAFLYGGCGGNHNNFPTKEKCLEKCGYRILDEENEIENTE                                                                                                  | U19-barytoxin-Tl1a (W4VSH9, <i>Trittame loki</i> )                |
| m.248055 | MEGNMLMVLLVASTIGLALS NPLVSRPNYDNIPQCLQPPASGMCLAYFPSYYYNPSKETCDTFIYGGCQGNANRFFSFDECMACGGFKQEPNDSFKLIL<br>ENGEDQNPSASEQQVEDICSLSTEMGPCRAMMPRFYFNGDKCEEFIYGGCEGNANNFKTIEECQQRCGSTSSSEEVEADNSEETEKASEEAVAEAEASVE<br>SAEESDSKAEN                                                          | U19-barytoxin-Tl1a (W4VSH9, <i>Trittame loki</i> )                |
| m.250351 | MKNEFLILFLIIGLFCPIYGILESDRLKRLIRIDLNNPLAKDVCDYPLDIGRCFGAKQRYFYNGDTCCEFTYKGCLGNANNFR TKEECMLKCAHKMEGGSGET<br>EEEEHFSFSLFG                                                                                                                                                             | kappaPI-theraphotoxin-Hs1a (P0DJ77, <i>Cyriopagopus schmidt</i> ) |
| m.41663  | MDSKIIAVFLLLVLSTCVLSEKYCPTTRNPYCKMMNIRNNCKDSDCSSGYCCSEPCGNFCHAPSSIPGGKRVNPNASCKLGYVYR                                                                                                                                                                                                | U14-lycotoxin-Ls1b (B6DD37, <i>Lycosa singoriensis</i> )          |
| m.1940   | MNSKIFAVLLLLALSACALSEKYCPTPRNTSCKKQNI RNDCCKDSDCTSNAFCCAQPCGNFCIAPSDNPGGRRVDPNASCKLGYVY                                                                                                                                                                                              | U14-lycotoxin-Ls1b (B6DD37, <i>Lycosa singoriensis</i> )          |
| m.41662  | MPHVLCEFYINKRMVVS NHYIQLSEKELICKMNSKIFAVL FLLALLTCVLS DQYCPKSRLTPCKMMNIRIDCKDEDCTGGSWCCATPCGNFCKYPINRPGG<br>QRAAGGENCKIGYVYLK                                                                                                                                                        | U15-lycotoxin-Ls1d (B6DD42, <i>Lycosa singoriensis</i> )          |
| m.11922  | MNSHILFVLLVGIATCVLAGDIELRINICSNELKANRKKCNENCKRLSFQDFGIKKEDRTTLFCFLHQIKPLR                                                                                                                                                                                                            | U20-lycotoxin-Ls1c (B6DD62, <i>Lycosa singoriensis</i> )          |
| m.240217 | MKPTYLFICVISLVLSAGRSQFCPVREPIFCIRRDLCSSHNECSV GELCCEENCGNVCLAVPRRTSGIEYRNPNCINESL                                                                                                                                                                                                    | U7-agatoxin-Ao1a (Q5Y4V9, <i>Agelena orientalis</i> )             |
| m.11914  | MNSHILFVLLVGIATCVLAGGFCPKSRHPHCNLSYKINDCCAQSDCRFGSVCCVEGCGNV CRAESDTPIGEKFVDGSECKLGHVFPKRWYEFW                                                                                                                                                                                       | U20-lycotoxin-Ls1a (B6DD60, <i>Lycosa singoriensis</i> )          |
| m.204789 | MMFKILLVAIFVLAESTERKTDCQEHREREAKSKASLPMRLIPECDENG DYKPLQCFKDSDFCACWDKQGNPVTQPSKTIKQCDCLVQKHEVEKKGLRGA<br>FKPSCSEDGRYQKQCHGSTGFCWCAHPETGEKTSEETRGRPN C                                                                                                                                | U24-ctenitoxin-Pn1a (P84032, <i>Phoneutria nigriventer</i> )      |
| m.217252 | MWIFI FLLALAVPTIRSERKCGECVPEKQCPPSEEC LAGLVKDL CGCCYVCGRREGELCDGDFLPIPYRNRGYGPCGEHLECRPRTDLAPGDPPEAMCVC<br>LKTETLCGSDGNTYDNECQLTEARYKQREQILKAMHRGPCRSAPKITSPPEEASNYTGGNIAMSC EATGWPIPVFEWRVDIGDGNTIPLPSDDPKVSVQS<br>RGGPSKYEVT SWLQLLSIQPKDDATYWCIAKNDEGESSAAARVVVLD FRGSKTEDNGRINDL | IGFBP-rP1 (G4V4G1, <i>Cupiennius salei</i> )                      |

### (4) TCTP family

| Name    | Sequence                                                                                                                                                                             | Similar peptide (Accession No., species)                                                 |
|---------|--------------------------------------------------------------------------------------------------------------------------------------------------------------------------------------|------------------------------------------------------------------------------------------|
| m.7640  | MIIFKDLITGDEMFTDSSKYKLIDECLYEVECRHVQRRQGGDIQLEGANPSQEEADEGTD ESVESGLDLVLNQRLVETGFTKN DYKNYLKTYTKSLQDKWKE<br>MGKNDTEIAEAKSKITEAVKKVLPKLADMQFFMGESSNPDGLIALLEYRENPGGDETPIIMFFKHGLDEEKV | Translationally controlled tumor protein homolog (G3LU44, <i>Loxosceles intermedia</i> ) |
| m.24068 | MRIFKDIITGDEMFTDSSKYKLIDDCLYEVECRHVQRRRLGDVQLDGANPSQEEADEGTEEVVESGLDLVLNQRLVETVFSKN DYKGYLKLYTKSLQDKWKE<br>MGKSDSEIADAKSKFTEAVKKILPKIGDLQFFMGESSDPDGLIALLEYRENE SGNETPIMMFFKHGLEEEKV | Translationally controlled tumor protein homolog (G3LU44, <i>Loxosceles intermedia</i> ) |

### (5) Non-toxic peptide

| Name     | Sequence                                                                                 | Similar peptide (Accession No., species)                     |
|----------|------------------------------------------------------------------------------------------|--------------------------------------------------------------|
| m.106956 | MKCIIALTILATLVVAIQGKFCERSSDCGEGQCCTGSSFN RHQCQLSDNGRPCQRPN DYDSYKTGCPCKEGLICSVINYCQEP    | U19-ctenitoxin-Pn1a (P83997, <i>Phoneutria nigriventer</i> ) |
| m.7591   | MRTMKCIISLTIVATLMCLVQGGDQSCGEVYCGEGQCCSGSFYARHCRDYSNDGEPCERPKNKYSYKTACPKCEGMFCNVINRCQKYE | U19-ctenitoxin-Pn1a (P83997, <i>Phoneutria nigriventer</i> ) |

## (6) Peptidase

| Name    | Sequence                                                                                                                                                                                                                                                                                                                                                                                                                                                                                                                                                                                                                                                                                                                                                                                                                          | Similar protein (Accession No., species)     |
|---------|-----------------------------------------------------------------------------------------------------------------------------------------------------------------------------------------------------------------------------------------------------------------------------------------------------------------------------------------------------------------------------------------------------------------------------------------------------------------------------------------------------------------------------------------------------------------------------------------------------------------------------------------------------------------------------------------------------------------------------------------------------------------------------------------------------------------------------------|----------------------------------------------|
| m.1011  | MDTSVSPCDDFYQYACGRWSKHHELPSDRSYNTFEVLKDKLQAKLDLLEPVTDDDSNATIKAKNLYASCMNEEVIEELKEKPLVLLDDLGGWPVTS<br>SNWTEENFDWVYLIATLQQYSNNILISQWVGPDGRNSSMHIIQIDQADLGLPSREYVYVQGTQQLDAYGRYMVEIAQLLGASPEKAEEMKEVLEFEIEIANF<br>TIPREERRNYTAMYHKLTLAELQVRILPVNWTLFFNVAMPLELTDDDEIVYIAYTYVERMTDFLVNTPKRVVANYILWRFVYKFVSNLDKRFQAKQQEYYSAL<br>YGTQSIIPRWKTKCTVYTNKIMGTAVGSLFVKTHFNERSKETAEEMIENIKTAFLELLEEVDMWDTETRSEARQKALLMTEKIGFPDYIMDPQELDKDYDGIEI<br>KPDYRFDNVLLSLKQYSIREQMKLRTLVDRTQWVSSPAVNAFYTRPKNFITIPAGILQPPLYHQNYIRLSYGGIGVVIGHEITHGFDDKGRQFDHRGNLK<br>QWWDSEALIKFQSKADCMIKQYGYMMTDINMKVNGINTQGENIADNGVGKQSKFAYKSWASRNSEEP LLPGLNLTHDQLFFLNYAQIWCGRSMRPEAAI<br>NMIRTVHSPGKYRVIGALSNSKDFSEAYGCP LGSPMNPCKCHVW                                                                                                                                | Neprilysin-1 (W4VS99, <i>Trittame loki</i> ) |
| m.15154 | MVSKGGCLGWLKKRTNLEKTLSSLLLLTLLLMILIGITYQGKKTNSPENEEECWSTECIQTAGDILKKIEPEADSCGNFYEYACGTYTKNLGQTISVPKQ<br>STDSVYFTLKRLMESKKNLDVRNLKDVRSFYDTCVKFGSHWQDLKETGDSLNNLMLDLGVGTWPIIDSLYDTSTFSRDKTFASLILLDVPVAFQMEIVPDQ<br>QISGSLVKISPGSPRESGRSPDIRGDVHLRSSVLTSFLLGANAKITDVNDIIAADSSFAAIEQDKNIVCDDVLLSPQEAPSELKRLIPEIDWKIILSEIRNVGT<br>LVRPF AVELHCKQKIRDYVVLNLDLTVRSEANYLGRWFFSKFVEHVPTFEKSQFGTDDVVRWRICLIELEKFSPTVLVDLLAKEIINKEVIAQTERISDSSL<br>KAAKRLVSRTQWLTNNQRSRIQEKVSRFRTRYPFKRTAADGDSGKLKIPQVNVNNTAVIVRQQRKWVIQRFRLSHEADNVDWIESRVPFLTARSDSVL<br>SDSVLYVYFDKIRTPYIQLKGSQWLNYYGGFGVTVAREISRLSSSVGGQGENTLLWNLWSNSSNTSKCLITSMAKRMGIHEEVLNALADEKLLQNLFLDQSA<br>IEIAYETAKMTAGSSKSLPGLLELNDKMFFLSYAQTQCEADLQVQKSNIPPIQNRLNSVLQNFDSFNEVFSASSSHCQIWA                                                                                         | Neprilysin-1 (W4VS99, <i>Trittame loki</i> ) |
| m.19936 | MRRADSTLKARDRYEKHSLTKFRNETGICYSPSCISEASNLLKSINMSVDPSCSDFYSFACGNWIKNAYLVSTLESQFTKLTRIIHLRVKSILEDELEKEDNLPDH<br>KMKTSDFYKACMDRDRHNEIGATEFLNDLKKFGGWPLIEEWDAAANFNWSNVMQLFKNGYISNMLFTVKLEIDAKNTRSIIAVMQPSLGLKNKLYYIIPD<br>GQIATSYKKAIFEVAKHLHPNANLVKKTSMDAIEKAFALESKIADLKEVNMRYPDQFYNIMTLEELNFAFKIPWRNLLKHLPPETILTNEERILVTVPSMIKG<br>LNKILEEMSTEQGRILSNYMFYRTAFFAASNLTETYNLIKGFINTDSVANNQLWEICVKDTMDLFLPLTSSYVAKYLNKNTKELLEVMFDDIKNALVEDIK<br>NAAWLDTETKNYALFKVKKMKAIAIYKKEIMKDENLNSFYKEVNVTDNHFSSNVKQLIAARQQRNMQGLHKKRDRFRWTDVNNLLTANAYYQPSNIIIPV<br>GVLHDTIFAERPNIYNYGSLGMIVGHELTHAFDSIGSLYDADGSYRMWWKESWKKFEERVVKCYKEQYDKFYLSEADSNVNGTLTLGENIADNGGLQTA<br>YYAYNLLLKRLGSEKSLPGLPYTERQMFWISFANVWCWKQTEESIQGYMIYSVHSPSGLSLNSNMKEFSEDFNCKLNSTMNPKSKCLLWK                                                                               | Neprilysin-1 (W4VS99, <i>Trittame loki</i> ) |
| m.9580  | MAGNLAVAFRNVTAQKCAWWNRRSPCEKFLFILCILLSTCAVLIIVNITEKRLVAEDIVSGICHSEECIKAAARILERLDTSTKPCDDFYHFACGNFLHRHT<br>VPDDHYLRSTMQTMQDDLYVTLKRIEHPQSSNDSEAIKVKKLYTSCMNTSSIEDGSVKVLQDILLTNWGIGEWPIPIPRWNKTVDMEWRLAMLHIHEVKPF<br>FSTFVAPDDRNSVYLLHINAGGFLLNPQYFLNTSDPDYVRYVL SYKNLIFETVRLLGQESDAKKDIEEMLEFEVEFANISQDDPFD SINETSQD DDFVFN<br>KINVSVLEDMIPEIKWNVLIEYIFDYIGLSTEKIDISFVHCEKYLRLHALLNRTPPKTAIANYLTWRVFMKYPYLDIHFRLRYDYFRREVVPVRAEERTFFARW<br>KECVHIATEGFGMALASLYVKDEFNEEMENEIKFLISSLKEAFIKSIHKQTLWDHDTKVLCEEKVSAMGNKIGFPYILDPFLQDADYVGLDVTEDHFLDNILK<br>INRYETKDL SKITRTVDKERDWFVQPLVNVNAYYEGSGNTVIFPVGILRRPIFTRPRPKYLYNGMLGVIIGHEITHGFDNNGRKYDKAGNFTQWWTDEIVEK<br>FKEQVSCYIEQYSQLPIDMVGQNVNGNQTLDNDCDNSGLAQAYRAYRHYVSKYGEPEPRLPGISYSNTQVFFLQY AQLWCEILSKEANERFIKDSHSPGKY<br>RANIPLMNSPEFSSAFNCPTGSPMNPVKKCLRLWA                     | Neprilysin-1 (W4VS99, <i>Trittame loki</i> ) |
| m.19952 | MFTSQYMNDFEKSRLYPERGPGKTFPVTTPLERTLIIIAIVVLIGIGLSIGIVSLKKARDRYEKHSLTKFRNETGICYSPSCISEASNLLKSINMSVDPSCSDFYS<br>FACGNWIKNAYLVSTLESQFTKLTRIIHLRVKSILEDELEKEDNLPDHKMKTSDFYKACMDRDRHNEIGATEFLNDLKKFGGWPLIEEWDAAANFNWSNVMQ<br>LFKNGYISNMLFTVKLEIDAKNTRSIIAVMQPSLGLKNKLYYIIPDQIATSYKKAIFEVAKHLHPNANLVKKTSMDAIEKAFALESKIADLKEVNMRYPDQFY<br>NIMTLEELNFAFKIPWRNLLKHLPPETILTNEERILVTVPSMIKGLNKILEEMSTEQGRILSNYMFYRTAFFAASNLTETYNLIKGFINTDSVANNQLWEIC<br>VKDTMDLFLPLTSSYVAKYLNKNTKELLEVMFDDIKNALVEDIKNAAWLDTETKNYALFKVKKMKAIAIYKKEIMKDENLNSFYKEVNVTDNHFSSNVKQLIA<br>ARQQRNMQGLHKKRDRFRWTDVNNLLTANAYYQPSNIIIPVGVLDHTIFAERPNIYNYGSLGMIVGHELTHAFDSIGSLYDADGSYRMWWKESWKK<br>FEERVVKCYKEQYDKFYLSEADSNVNGTLTLGENIADNGGLQTAYYAYNLLLKRLGSEKSLPGLPYTERQMFWISFANVWCWKQTEESIQGYMIYSVHSPS<br>RFRIIGLSLNSNMKEFSEDFNCKLNSTMNPKSKCLLWK                       | Neprilysin-1 (W4VS99, <i>Trittame loki</i> ) |
| m.60402 | MHNKGGDEKTDPKENDKCMENNEHDKDSEVNQKSSKLDALRGRAKQLASNKYHLIIVLLCVLLFILFLIVILAVQLGTYACEVNECRTADCLRAASFVL<br>DRSEPEDACDDFWAYSCKNWSIQNPVPANKGSYSVTDELQDKIYNRIRHLIDLIRHVDSSSIEMKVKTFYDSCRNMHNIERRFPDDIKRAIYDIGGWSLIE<br>YARPLQWDRMEVLSDLHSVYGIPVFFQVVEPDDLDPQRNIKILPGGLGLPNRDYYFRPHDDTYVKAYKTFMIDTVKEMGVGLSKANQFADEVFNYEKRI<br>AEITPSTEELRSPNLYVVKTIKDLDIPPSVIQWTKFLQAYFKDSADPETEIGVLSENYFLDISRIISSTADSVLNNYYMWRFHTFVPFSSSRFRLVANYFKQT<br>FTLHRAWGEISQHYSSLTGKVRQEAREWEHCLGTLSSGLSTALASLYVRHHFQDGSGLDALEMVNYIHREFLHVLSDVDWMDSQTKERAKEKAQNMDATYI<br>GYPNELLEEWKVSEIYDGLHLNSSSYFENIRILRKWATDYVL SKLRKPNVKGDWKKRSAAAVNAFYNSIENSIEFFAGILQG VFFSKDRPNYLNFGAIGFVI<br>GHEITHGFDGRGRQFDKDGNNINWWEPETDSTFRERAQCIIDQYGNYSVDEVGLQVNGINTQGENIADNGGIKEAFRAYLQWIRDHGAEDYLPGIKYSPT<br>QLFWISAANVWCGKYRPEVLKLRIMTGSHPAPYRVIGPLANTPEFAAEFGCPLGSPMNPVKKCTVW | Neprilysin-1 (W4VS99, <i>Trittame loki</i> ) |
| m.28887 | MAVTVTQSQLTSGRDRFRNPPWWNRRSLERILCGVAGICLLMCTAMAVALAVVGYHYQVMKTGNGVNEAGLPSKTDKLVSLYNAIYPPKEIGICLTP<br>GCVKAAATILNNINEKVEPCENFYEFACGGWLQKQLIPDDRSSSVSFSLLQDDLDQLLRSMVETGIKDTDPQYIQNLKSMYESCMTTHIEMMGNEP LLRV<br>VKELGGWPAVEGDKWNSTNFDWMEALFALRKVGF GHNIFLSVSGIPDIRNNTRHIVDLQASLGMPDRNLYLLKGVEDPLVSAYYQLMVD SAVLLGANKTK<br>AQEEMKSALLFEIAIANFSVPREERRNISRLYNKMTVDDLK LAPDLNWDKYFNKLLMDKISRSEEIVIVPDYVQNLEKMLSTDKRVIANYLMWRVVGGQAF<br>PTLHRAWGEISQHYSSLTGKVRQEAREWEHCLGTLSSGLSTALASLYVRHHFQDGSGLDALEMVNYIHREFLHVLSDVDWMDSQTKERAKEKAQNMDATYI<br>GYPNELLEEWKVSEIYDGLHLNSSSYFENIRILRKWATDYVL SKLRKPNVKGDWKKRSAAAVNAFYNSIENSIEFFAGILQG VFFSKDRPNYLNFGAIGFVI<br>GHEITHGFDGRGRQFDKDGNNINWWEPETDSTFRERAQCIIDQYGNYSVDEVGLQVNGINTQGENIADNGGIKEAFRAYLQWIRDHGAEDYLPGIKYSPT<br>QLFWISAANVWCGKYRPEVLKLRIMTGSHPAPYRVIGPLANTPEFAAEFGCPLGSPMNPVKKCTVW | Neprilysin-1 (W4VS99, <i>Trittame loki</i> ) |

|          |                                                                                                                                                                                                                                                                                                                                                                                                                                                                                                                                                                                                                                                                                                                                                                                                                                                 |                                                                          |
|----------|-------------------------------------------------------------------------------------------------------------------------------------------------------------------------------------------------------------------------------------------------------------------------------------------------------------------------------------------------------------------------------------------------------------------------------------------------------------------------------------------------------------------------------------------------------------------------------------------------------------------------------------------------------------------------------------------------------------------------------------------------------------------------------------------------------------------------------------------------|--------------------------------------------------------------------------|
| m.43613  | MFIDDEMPRYKRTDFEEEEETSSMASMAVDAPMNPPSSQGVQVRYSPGRRRNIWERASPLEKILVVCVLVLVLLVIILSAVLNSYSSSGTVKVHITAKNGSS<br>SGNNATEYCVTPACVTVAAILNAMDQTVDPCTDFYQYSCGGWIRSNPLPDDKSIWGTGKGLWQENQIVMKNVLEDDSFKLTSEAERKARIYYMSCLDKN<br>ETVDKLGAKPIIDLLSKIGGWNISGDFNISQWNFQRTLELLHNQYNRGGLFSWGVGEDERNSSRNILQLDQGGGLPTRDYYLNKSKDDEVLVAYLNYMTK<br>VGVLLGGEENATRAQMEDVIEFETKANITIPADERRDEELYHKKTNLNLRDLAPVLDWASYFNSAFRINREITPAQELVVYAPEFIHKMSELVTQYLSSN<br>EGKVVISNYLGWSLVQSLTSCLSKPFREASKILRKALVGSEGGESPWRYCVSDTNEVIGFALGAMFVREVFGDSKPMAMENMINEIRDAFKENLPLLKWM<br>DPETRLAKEKADAITDMIGFPEFILDPKQLDKKYEGRMDFSEDEYFNNNIEVQGQFALLSNMRKLDKPTNRSEWKMTPTTVNAYYTPTKNQIVFPAGILQAPF<br>YDPNYPKSLNFGAMGVVMGHELTHAFDDQGREYDKYGNLHQWVNKSTIESFRERTQCIVDQYSSYEVNGESLNGKQVLGENIADNGGLKAAFHAYQD<br>WVKSHPIELPLPAVPLSNNQLFFIGFAQVWCSTSTPEAMHLQILNDPHSPAIFRVVGTLSNSVDFAREFKCPPKSAMNPENKCEVW | Nepriylisin-1 (W4VS99, <i>Trittame loki</i> )                            |
| m.252247 | MYDYDIALQMERAPEYNEYVVRPICLPPELPPKELPDDSPLYKPKSSAWATGWGHDAKISRNDRVIPRTTENLKELYLPQSKERCIESTRSNGVNISFFTDRMFC<br>AGDGGSGGNDTCQGDSSGGPLMQAQTNAEGYIYWTQVGIVSWGICQGMPTNYGYTYTLQRFVPWVEETIENALGAVGM                                                                                                                                                                                                                                                                                                                                                                                                                                                                                                                                                                                                                                                     | Venom peptide isomerase (Q9TXD8, <i>Agelenopsis aperta</i> )             |
| m.77294  | MIFHVSILVTAISLLFGIKYPVFMTHGVFNISHDLALARLNAPVLMNPHVQVVCPLQLNEELQAGERCATGWGATRGSKSENVLKQAEHPIQDETKCYNEY<br>QKFESETMICSGRLEPLHLGLCHGDSGGPLVCKKDGKWHVYGVASFITDTNFISGLCGLANKPTVFNKISAKVEWIKSIISNNN                                                                                                                                                                                                                                                                                                                                                                                                                                                                                                                                                                                                                                                   | Venom peptide isomerase (Q9TXD8, <i>Agelenopsis aperta</i> )             |
| m.183905 | MSSGEIVCSGTIINKRFVMTSAACVTTSSKIPKKNPNEISVVLGLSNRNGGDSQSRFGVKAIYVHPGYRTLNYDNDIALLELEKPMVYSRYIRPICLPTDSSNLY<br>KPQSPGLGLGWGSTSPWGNAGTLKRNSLKEIKVTIQHPDACKEYLGEKYARYFTNLVFCAAEESPALCSGDSGGPVMQSEMREDGHRIRWQVGIVSFG<br>MGCNPNSMGFYTYVYKFLPWIQDIADNSN                                                                                                                                                                                                                                                                                                                                                                                                                                                                                                                                                                                                | Venom peptide isomerase (Q9TXD8, <i>Agelenopsis aperta</i> )             |
| m.183910 | MAAVFYVKDSVTKDDIVCSGTIINKRFVMTSAACVTTSSKIPKKNPNEISVVLGLSNRNGGDSQSRFGVKAIYVHPGYRTLNYDNDIALLELEKPMVYSRYIRPI<br>CLPTDSSNLYKPQSPGLGLGWGSTSPWGNAGTLKRNSLKEIKVTIQHPDACKEYLGEKYARYFTNLVFCAAEESPALCSGDSGGPVMQSEMREDGHRIRW<br>RQVGIVSFGMGCGPNNSMGFYTYVYKFLPWIQDIADNSN                                                                                                                                                                                                                                                                                                                                                                                                                                                                                                                                                                                    | Venom peptide isomerase (Q9TXD8, <i>Agelenopsis aperta</i> )             |
| m.61171  | MFTAICILWSLQLIQGSPLDLSLEDTRPLCPCGDYASSVNTRVVGGHAVPKHEFPYASNLLFRPFEEYSSRQASQKLSPFCCGGTLITDRHILTAACHLKDRD<br>PEDLAVDVGDYSLRELKDRQVNVNRNVTKFPEYRKDSFHTDIGIIELEHPVFRQGMRTALLPNEGLKLKPGTTVSVYGWGRLSYYGGHPDVLNTVDLPV<br>VRNEECQHEFISRIEPSMICAGGQEGKDACIGDSGSLIVRLDNEFVLCGVVSFGRKCALPHVPGVYTRVSSYTDWILDQTRSASCRPCVYDE                                                                                                                                                                                                                                                                                                                                                                                                                                                                                                                                  | Venom peptide isomerase (Q9TXD8, <i>Agelenopsis aperta</i> )             |
| m.71477  | MFADSKRPRFCMLHRNTTLNSYFLLSILFTLGCVAKGGRPKTVKNCGIVDVPQARIIGGIWAQHGDPWMVSVHEYYRGFDHVCGGTIINEHWILTAACHID<br>YPTKPRKYEIVVGLHRLSKKDRKVSCKHKISKVIVHEEYDKETFLNDIALLRTEKPINFRASRGYVNGICLPVTDKDPKGWAIVTGWGHTLEGGDNDSDVLKEV<br>KVPIVPRELCNEAYDDDDPDIEENIFDTQLCAGAPNRDSCQNDSSGGLIQRSKNGVHTLIGVVSYSYSGCGDRHFGVYTKVASYMDWMYKNMKD                                                                                                                                                                                                                                                                                                                                                                                                                                                                                                                             | Venom peptide isomerase (Q9TXD8, <i>Agelenopsis aperta</i> )             |
| m.4971   | MQLVFAAFLLLLTGYTSGKLSTVKDCGKATVPQARIVDGEVSKRGKYPWMVSVQQWDGDKLRPICGGAILNENWIVTAACHCFDQPVKNSDYEVYVGLFSI<br>TKTNEPPVRKHVKSKIIHEDYKDTGFANDIALIKTATPIDIKGSKGYVNAICMPSGITNPAGDAIVIGWGTIYDDGPLSAELREAVVPIVPWKKCKEIYGNINS<br>FEYVQVTPFVMCAGGTGKDSCQGDSSGGLFQFDKNGVATLLGTVANGGDCGNGRYPGMYMKASAYKSWMDRVTT                                                                                                                                                                                                                                                                                                                                                                                                                                                                                                                                                 | Putative PQM protease precursor (AUI10826.1, <i>Geolycosa vultuosa</i> ) |
| m.4960   | MQLVFAAFLLLLTGYTSGKLSTVKDCGKATVPQARIVDGEVSKRGKYPWMVSVQQWDGDKLRPICGGAILNENWIVTAACHCFDQPVKNSDYEVYVGLFSI<br>TKTNEPPVRKHVKSKIIHEDYKDTGFANDIALIKTATPIDIKGSKGYVNAICMPSGITNPAGDAIVIGWGTIYDDGPLSAELREAVVPIVPWKKCKEIYGNINS<br>FEYVQVTPFVMCAGGNGKDSCQYDSSGGLFQFDKNGVATLLGTVANGGDCGNGRYPGMYMKASAYKSWMDRVTT                                                                                                                                                                                                                                                                                                                                                                                                                                                                                                                                                 | Putative PQM protease precursor (AUI10826.1, <i>Geolycosa vultuosa</i> ) |

(7) Metalloprotease

| Name     | Sequence                                                                                                                                                                                                                                                                                                 | Similar protein (Accession No., species)                                   |
|----------|----------------------------------------------------------------------------------------------------------------------------------------------------------------------------------------------------------------------------------------------------------------------------------------------------------|----------------------------------------------------------------------------|
| m.136344 | MKVINWNIFVMNLLAEDPMVTEGFFEGDIDTENSFQMLNGISDDNLRWPNNAIVYYAIEENLHHIKPLIQKAMQHIESKTCIGFVERTNEADYVWIHIGKCSA QWGRRGQKQRLSLGHTGCHTLGVVVHMLHAIGFQHEHSRSDRDDYITIFLENVRPGQEHNFKEKLEPSENRLLTQFDTSSILLYGSTTFARPNTYSMLLKD GSVMVEVYKNSMTNLDAEKVNKLYQCT                                                                | Astacin-like metalloprotease toxin (A0FKN6, <i>Loxosceles intermedia</i> ) |
| m.44881  | MVAALVILLSIGCSLVTSKAYLGDLP IQNPDLFGGDILGIEDAEDRNAIVDKRQIWPGGVVPYEQDPGLKATVFRLTLEGAFDQYKKSTCIKFVPRTEKDYI RLFPGEGCYSHVGRGTGGQQPVSLGQGCWGMGTIVHELGHAI GFYHEQNRSDRDDWLIYWENVKEGMEDQFFKLKPDQNLTPFDYDSIMLYGSYTF S KDRKKLKT MVGKNNEFLQE VISKYRLSKSDIQRI NTLYNCKM                                                | Astacin-like metalloprotease toxin (A0FKN6, <i>Loxosceles intermedia</i> ) |
| m.35058  | MAPFFYFTCVVLWLGSSSATEDFLGDLP MQNPDLFQGDILGVEDPEDRNAIVDKRQIWPGGIVPYVLDPGITKTVSPAILTNAMWLYKRDT CIRFVPRTNEA NYIRIFPGQGCYSHVGLTHVGAQPVSLGQGC GYMGTVIHEL AHALGFYHEQNRSDRDDWLT IYWDNIKEGMADQFMKLKPDQNLTPFDYDSIMLYGS YTF SKEYGKLKTMEGKGMFLKD VIRKYFMSKSDIQRIKALYKCP S                                           | Astacin-like metalloprotease toxin (A0FKN6, <i>Loxosceles intermedia</i> ) |
| m.220610 | MFALAALSLFLVITTLGSRPEKDGPNVHPEYLDHLLDTEQYELFAKVMNIPDASLVRPKEGERSENPMFNKDLEMGDIVAFGLPKEESRQGINFDRYPGS KWQNGELHFYIKLNDFTESQLQTIYDAIDSWNRVRCLRLIDLRET VRKISDYVYVFGNGCWSYLGRI GGEEQGLSLQPNGCVWKGTVLHEFNHAAAGFAH EQNRLDRDDFIEMLWGNIPDDWKSQYEKTNPRDYGLQCSYDYYSIMHYGIKAPGTNKDAFRVKQDGIDQNKIGRST EFTKIDIEKINKLYC | Astacin-like metalloprotease toxin (A0FKN6, <i>Loxosceles intermedia</i> ) |

(8) Acetylcholinesterase

| Name     | Sequence                                                                                                                                                                                                                                                                                                                                                                                                                                                                                                                                                                                                                                                                                                                                                         | Similar protein (Accession No., species)               |
|----------|------------------------------------------------------------------------------------------------------------------------------------------------------------------------------------------------------------------------------------------------------------------------------------------------------------------------------------------------------------------------------------------------------------------------------------------------------------------------------------------------------------------------------------------------------------------------------------------------------------------------------------------------------------------------------------------------------------------------------------------------------------------|--------------------------------------------------------|
| m.101805 | MRRD TLLFCLLYLSYLLPCRSLLSRRVTTTPSGRVEGTVQSHNGVSVNAFLGIPYARPPVGDLRFKAPRT PAPWEGTLSAKEMRSGCVQFTRNPF PWRD VPPGLSEDCLYLN VWAPSTLLNTINRRTVMFVYGGAF LFGSSSRVDFYDGHVLA VEGDVVVVT VNYRLGPF GFLYAGNEDAPGNMGLLDLVEALKWVRG NIASFGGDPNSITLFGQSAGGIAIGMFCVSPLTRGLFKRVMQSGSPTNLGGEDNNLDAKMSQRLAEAVGCAEDENSLADDPETVVECLRNVD AFELARTF SALGGNGSRLVYPRFGDELL PQNPRKAI AKGDFGAVDVLIGSNGD GALIITDSMTEVFGFFGEKDPQINRTFGTSIIK RQFQDFVAPCSVVKQLGGVQDD DFDGIRQQVFMATGDYERTCPATYFAESFAKKGVKAYYYFFTHRPSKSPFAPWMLASHFDETPFVFGYPLRYTRNYTIRERLLSRRMIQAWATAFAKTGTPI GGVWPQYSRENPRYQILDVNSLGTGMGPRQNNCDFFRPF FGF                                                                                                                                                                                | Acetylcholinesterase-1 (W4VSJ0, <i>Trittame loki</i> ) |
| m.126349 | MRLFLLLSIITLASCDRTVTTTNGPVKGISLSPKKVVAFLGIPYAEPPVGPLRF AKPIPKSFSEEVYLANEFPPSCVQASLGDFYFAPDPKGKMS EDCLYLNV WVPEGGSDTKPIMLFIHGGA FMVGSSNMKVYDGANLSEHGDVIVA AINRYRLGTLGFFSGFVEDAAGNMA MYDQVMAIQWIKNNAKHFGGDPDNIVLFGQ SAGGFSTSLHISPLSKGLFKRAILQSGTVVSPLFKSNDVLQMTSQYLASFLGCTDENNSLNKNPQSVIDCMKALPTEKIIQADGILLKSGGMMFPRIGDSFL PENSVD SYKNGDFK DTEILLGVT SNEGSLFLVFHMTD TLGSGFGQKIEVQDFNETS AMQYFKRISQHNSKGM PSEIVQEYFDRVKKDPGYTYLQATS DLMG DIIITCGAVFQADYYSLRDNPVYFYVFDYRPDSTPLAEWGMVAHFDEM QYVFGNPLHQEFTEYEKEFSGDIMDMWVAFAKTGNPNIPGGVKWPRYSYQD PKYLVLSKRDRVAVKPDNN SCEKWRKV FETEIKEDTLKKLKKPA                                                                                                                                                                        | Acetylcholinesterase-1 (W4VSJ0, <i>Trittame loki</i> ) |
| m.229987 | MRLVCLLLLFGCTLAFDYE GYGCDNPNYIRDAGPLVRTSSGSLFGKYVKVFDTKVAAFLGIPYASPPVSEKRFLKPTPLERWDGVLDATVKPPPCMQYSSR NFSWIPKSTPSEDCLYLN VWTPAKCCCTG SERLPVMVWIYGGGFYSGSTDMDVYDGSTMVSYSKAI VVSINRYVGIFGFLSSGSDEAPGNVGLLDQNLAL KWIKNIGYFGGDPERITIMGESAGAMSVSLH MVSPMSRNL FQAAILQSATAYQPQMVDNKAMS YIKANTFAK VIGCLQGNSSIESDPEVMECLKAKSSWE LARAEDVFTSKLPQYFLPTYGDEFLPTSPFKAFNEGHLAPVDILIGNNRDEV TIFLNYMVPDIFRLDSEPQLNLEAAKQIIHGLFQT VPRPSATEIFDHYFQNV SEGDSSEIVKTIAHAFGDYVFYCPVALFAEKARNAYVYVWSHR SIRDQNP EWLGVPHFYEVFPVFGVPIQD TFFTYPEDGRFSADLIKKWTTFAEHGHPLG DRNPDDWPPYSAENPMAYELNPRQRGLLSFPRADACEFWRPYIVPKTC                                                                                                                                                                     | Acetylcholinesterase-1 (W4VSJ0, <i>Trittame loki</i> ) |
| m.130212 | MKFLFIQSCFTVVTFRLLFAPVFG EESNFGQQNSRYFAEPEFKYYTTQNFRYSYTEFDHAAHDERCGPIYESKPTHKITPLGIVRGRQVFLCDRPGIPLRQR PQQIGKYIHSVQVFLGIPYAEPPVRRRNEENLQFKEPLEKQKFIDIDASSYKPAC PQHKKYFSKGQGINTTSEDCLYLNIFSPVQEDSDSLLNGYPVMYIHD GNWDHGS GALFPGHMLAASQKV VVVTFN YRLGPLGFLATGDSNSPGNYGMLDQVAAINWVYQYIKAFDGDGDPDKITVFGSGVGGAS AALLALSRLTKRKIK RVIAQNGSPVADWAAISDPRFMQNTTEIVGEG LGCSQQDTAHLVECVGTRLN EIKILEIKPRIGWLPWGPVVDNFTRRSLDQFLHESPEDMLEKGIDFRKD FAFMTGVNRDQ GASIFLEDVITYRDL DITSQVFDKIRSFMKM YNYSVNAEGIFDAIKFMYKPLDSYNETLLREAYIHLLTD RYYVAPMEKIVHLMVKNKVPT YAYVLYNTLQGYSTILKDFISPEVDYLLLSGAPFMDPKYYPAYLNLKNAKWTEADRNMSQAMMEAWANFARDGEPTKTRLFNTIMWEKVEENYLR YLNFN ATNTSSEMIYKYRERESRFWNFFLPFFIDREPPTLAP TLEPGVAELRLLTSALWGSV FVAVLLIVITLVCCSLYCRVRRYDSY                        | Acetylcholinesterase-1 (W4VSJ0, <i>Trittame loki</i> ) |
| m.130210 | MKFLFIQSCFTVVTFRLLFAPVFG EESNFGQQNSRYFAEPEFKYYTTQNFRYSYTEFDHAAHDERCGPIYESKPTHKITPLGIVRGRQVFLCDRPGIPLRQR PQQIGKYIHSVQVFLGIPYAEPPVRRRNEENLQFKEPLEKQKFIDIDASSYKPAC PQHKKYFSKGQGINTTSEDCLYLNIFSPVQEDSDSLLNGYPVMYIHD GNWDHGS GALFPGHMLAASQKV VVVTFN YRLGPLGFLATGDSNSPGNYGMLDQVAAINWVYQYIKAFDGDGDPDKITVFGSGVGGAS AALLALSRLTKRKIK RVIAQNGSPVADWAAISDPRFMQNTTEIVGEG LGCSQQDTAHLVECVGTRLN EIKILEIKPRIGWLPWGPVVDNFTRRSLDQFLHESPEDMLEKGIDFRKD FAFMTGVNRDQ GASIFLEDVITYRDL DITSQVFDKIRSFMKM YNYSVNAEGIFDAIKFMYKPLDSYNETLLREAYIHLLTD RYYVAPMEKIVHLMVKNKVPT YAYVLYNTLQGYSTILKDFISPEVDYLLLSGAPFMDPKYYPAYLNLKNAKWTEADRNMSQAMMEAWANFARDGEPTKTRLFNTIMWEKVEENYLR YLNFN ATNTSSEMIYKYRERESRFWNFFLPFFIDREPPTLAP TLEPGVAELRLLTSALWGSV FVAVLLIVITLVCCSLYCRVRSYKRPPDDLDSREVIVNHSATQQD TAV | Acetylcholinesterase-1 (W4VSJ0, <i>Trittame loki</i> ) |

### (9) Cysteine-rich secretory protein

| Name     | Sequence                                                                                                                                                                                                                                                                                                                                                                                                                                                                     | Similar protein (Accession No., species)               |
|----------|------------------------------------------------------------------------------------------------------------------------------------------------------------------------------------------------------------------------------------------------------------------------------------------------------------------------------------------------------------------------------------------------------------------------------------------------------------------------------|--------------------------------------------------------|
| m.230427 | MHIFSLFLSITILVTYAVAQNTTECPFLFRYSSTHSYCKTDNPKCNILRSFINEEEKNTIVRVHNSYRSRLAIGEEQNLPTAGDMLQMVWDELA AVAQKHA<br>QQCLFEHDCANCRRVQNFGVGQNLAIQVFNSPSPNSNWP SAIKSWYDEIAYFSSNAIDPFIAPPEPTYGHFSQMFWASSWRIGCGYVLYQDRNMYQ<br>KLYVCNYGPAGNTVSQSMYKVGSPCSACPLNSCCDKTCGAKAEYSGLCKITDNKAPKYKPVVPYIFYCDFNNQSDCQSYVTGVNKWL VYNTLSGSFLSIIL<br>KGGEESMTFQNKIKPSTSAFCFVVMYRKGPNEDGKEEASTATETFSGSGFEFQQNLPTFNGDVKKQFSQFSMTLSWNMETEIKITFAVPAGKPDQFFEI<br>QSIYATEGLCKQ                                 | CRISP/Allergen/PR-1 (W4VS53, <i>Trittame loki</i> )    |
| m.45429  | MSAPLGIPSMFLALCALLCVL VAVQSAYCPDPYKRYSKDHSYCVGVCCSCAKYRRGVSPWLKQELVRLHNNLRSKVAGGKSYGVDHLPRATNMLEMVW<br>DDELA EVAQRWSDK CERKSDCEDCRRVGRFGVGQIIFDFDGKMEGEDIENEFSSRFQGLQSFQKEQVERFTAGTNPKTAQMLWAKTWIRIGCGFLDFNY<br>PGNGRRYTQIVCNYPNGNVEGEEVYKGGSVCSACPANTCCGDSCKKYNLKANYHGLCKVIDENLPPEGNVPHKKTGNEVFYCGFNDESDCSHSEGV<br>DRWIRNVTTGGTWLNTYLGNYGHTVLKFNQPIISKSGKLCLAIKTRSGPMEAGQPYRYQLSGGLEEEGKFSTSFVFPADDNVKHKFHTDYFQPSEFPKN<br>RGAKLTL SFQVSGEGPKTYLEIDSIVALEKDCPKKTITEGTGTFITSP | Venom allergen 5 (A9QQ26, <i>Lycosa singoriensis</i> ) |

### (10) Techylectin-like protein

| Name     | Sequence                                                                                                                                                                                                                                                                                                           | Similar protein (Accession No., species)                          |
|----------|--------------------------------------------------------------------------------------------------------------------------------------------------------------------------------------------------------------------------------------------------------------------------------------------------------------------|-------------------------------------------------------------------|
| m.72849  | MSFSSNISDEAQASIVVTLN NARNLLDDAKKYATMKTLSAAENVVYRPMDCAEVREKNPLARSGVHKI WPHSRVNGSVEVYCDMEDDGGSWTVIQR<br>RGDFDSESDYFFKEWQFYKVGFGDRMKDFWLGN DVIFALTNQRLN                                                                                                                                                               | Techylectin-like protein (P85031, <i>Phoneutria nigriventer</i> ) |
| m.257368 | MIFALTNQRLNEVKFTLTDWESNTTYATYDEFWIDDEDHKYTAHVSGYKGTAGDSFYNTNGMPFTTKDQDNDKYEKNCAVQSRGAWWYGRCHMSNLN<br>GMYLKG FHESNADGVNWYSLRGHHYSFKD TVIKIRPKGFQKNQCGTTSL                                                                                                                                                           | Techylectin-like protein (P85031, <i>Phoneutria nigriventer</i> ) |
| m.72846  | MLSRLLVWVNLMGVMYLGIYADDPQFISPLSRNITDQTQSSIVVTLN NARNLLED AKKYASIKTRCYAAENVYGRPMDCAEVKEKNPLANSGVHKIWLHS<br>RAVNDAVEVYCDMEDDGGSWTVIQR RGDFDSGKDYFYKDWQFYKKGFGDRMKDFWLGN DVIFALTNQRLN                                                                                                                                 | Techylectin-like protein (P85031, <i>Phoneutria nigriventer</i> ) |
| m.72851  | MLSRLLVWVNLMGVMYLGIYADDPQFISPLSRNITDQTQSSIVVTLN NARNLLED AKKYASIKTRCYAAENVYGRPMDCAEVKEKNPLANSGVHKIWLHS<br>RAVNDAVEVYCDMEDDGGSWTVIQR RGDFDSGKDYFYKDWQFYKKGFGDRMKDFWLGD SFSAVNGLPFTTKDQDNDKYEKNCAVQYTGAWWY GSC<br>HLSNLNGKYLKRVHKSHADSVNWHGFRGHNYS LKDTVIKIRPKDFQKNLSGITPL                                           | Techylectin-like protein (P85031, <i>Phoneutria nigriventer</i> ) |
| m.265263 | MINHWVPVMGILLFCTDCGAADSTCGE KVSLEYHDAADLIAKAYHFPSRLHCENLSRNAVDCSEWLEKGYKKNGVYTVWPQSRVVDGKPLEVYCDIET<br>DGGGWT LIQRRGSF GRAVDYFYKDWKSYKEGFGDTEKEFWLGN DNIFALTNQGLYSARFDMKDIDNETRYAHYDKFWIDDEYNKYTLHIADYRGDAGDS<br>LVEHHNHQKFSAKGEDNDNQKDENCVEKYRGGW WYNSCHESNLHGLNLKGKHESFANGINWKS WKGYDDSLQSTEIKIRPRNFKLPHSSLNNTPM | Techylectin-like protein (P85031, <i>Phoneutria nigriventer</i> ) |
